# Supplementary material
Source: PubMed Central journal article supplement (PMC3431120)

Figure S1

CD

R&R

Aph

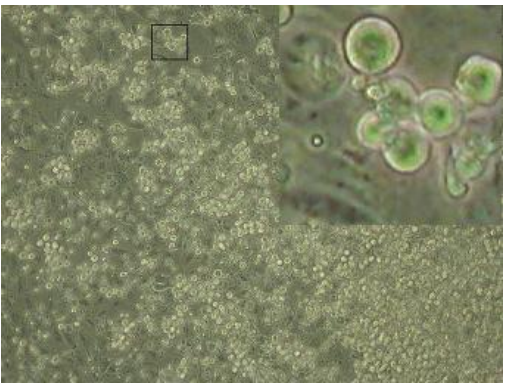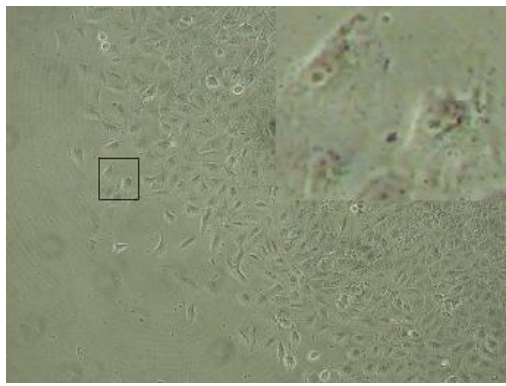

+

Eto

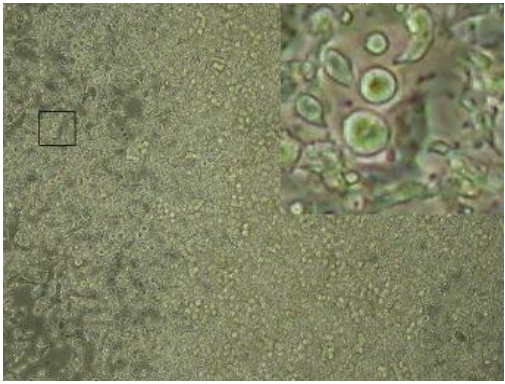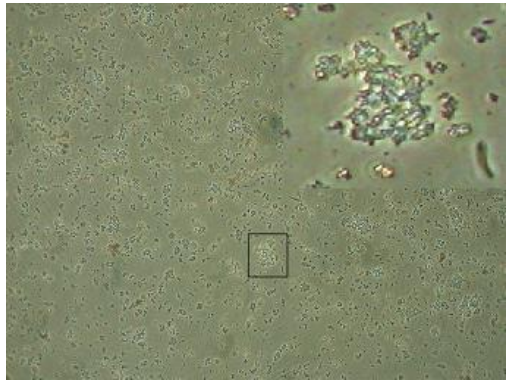

-

Pac

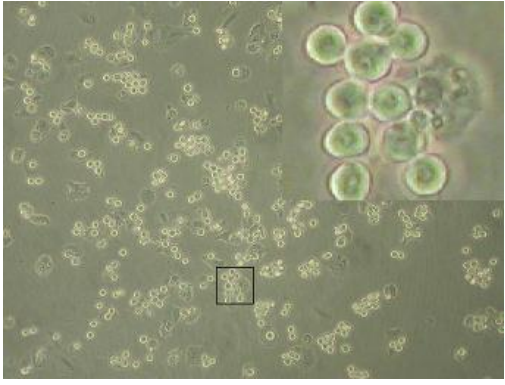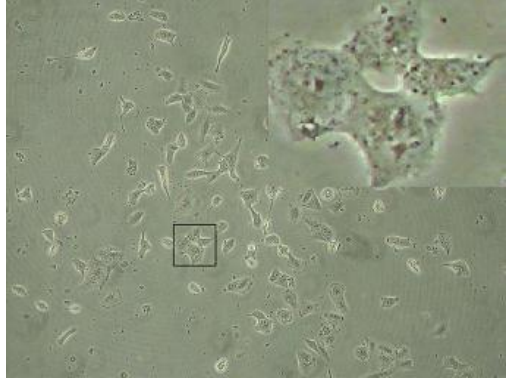

+

HU

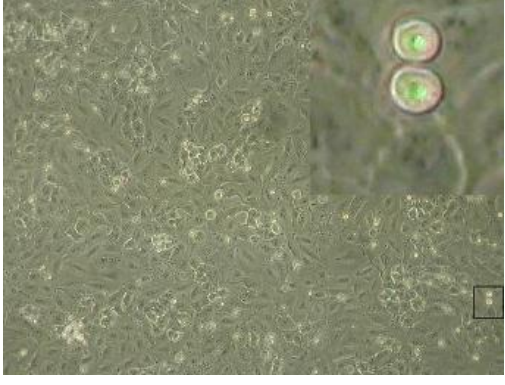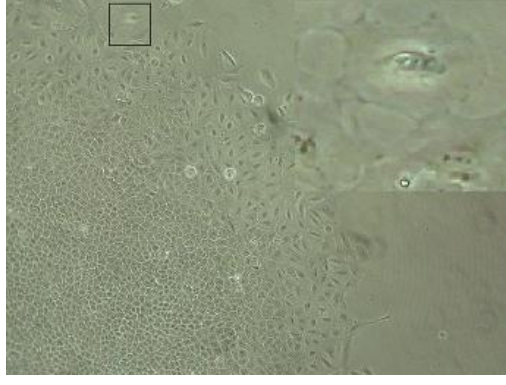

+

Supplement: 307102.f1.pdf [file 307102.f1.pdf]
